# Supplementary material for: Target and Suspect HRMS Metabolomics for the Determination of Functional Ingredients in 13 Varieties of Olive Leaves and Drupes from Greece
Source: PubMed Central journal article supplement (PMC7660111; doi:10.3390/molecules25214889), 2020-10-22
Supplement: molecules-25-04889-s001.pdf [file molecules-25-04889-s001.pdf]

SUPPLEMENTARY MATERIAL

# Target and suspect HRMS metabolomics for the determination of functional ingredients in 13 varieties of olive leaves and drupes from Greece

Evangelia Kritikou, Natasa P. Kalogiouri, Lydia Kolyvira and Nikolaos S. Thomaidis\*

Laboratory of Analytical Chemistry, Department of Chemistry, National and Kapodistrian University of Athens, Panepistimiopolis Zographou, 15771 Athens, Greece

\* Correspondence: ntho@chem.uoa.gr

Received: date; Accepted: date; Published: date

**Table S1.** Olive leaves and drupes varieties and geographical origin

| Variety         | Geographical Origin            | Sample                   |                           |
|-----------------|--------------------------------|--------------------------|---------------------------|
|                 |                                | Leaf<br><i>Sample no</i> | Drupe<br><i>Sample no</i> |
| Koroneiki       | Naxos (Melanes)                | 1F, 1F2                  | 1K                        |
| Throumbolia     | Naxos (Melanes)                | 2F, 2F2                  | 2K                        |
| Konservolia     | Naxos (Melanes)                | 3F, 3F2                  | 3K                        |
| Koutsourelia    | Aetolia-Acarnania<br>(Agrinio) | 4F, 4F2                  | 4K                        |
| Konservolia     | Aetolia-Acarnania<br>(Agrinio) | 5F, 5F2                  | 5K                        |
| Kalamon         | Aetolia-Acarnania<br>(Agrinio) | 6F, 6F2                  | -                         |
| Petrolia        | Serres (Skoutari)              | 7F, 7F1, 7F2             | -                         |
| Amigdalolia     | Attica (Votanikos)             | 8F, 8F2                  | -                         |
| Kalamon         | Attica (Votanikos)             | 9F, 9F2                  | -                         |
| Konservolia     | Attica (Votanikos)             | 10F, 10F2                | -                         |
| Koroneiki       | Attica (Votanikos)             | 11F, 11F2                | 11K                       |
| Koroneiki       | Messenia (Kalamata)            | 12F                      | -                         |
| Kalamon         | Messenia (Kalamata)            | 13F                      | -                         |
| Megaritiki      | Attica (Aspropyrgos)           | 14F                      | -                         |
| Megaritiki      | Attica (Sounio)                | 15F                      | 15K                       |
| Megaritiki      | Attica (Megara)                | 16F                      | 16K                       |
| Mastoeidis      | Laconia (Sparti)               | 17F, 17F2                | 17K                       |
| Agouromanakolia | Laconia (Sparti)               | 18F, 18F2                | 18K                       |
| Agrilia         | Laconia (Sparti)               | 19F, 19F2                | 19K                       |
| Agouromanakolia | Arcadia (Kynouria)             | 20F                      | 20K                       |
| Megaritiki      | Boeotia (Dilesi)               | 21F                      | 21K                       |
| Koroneiki       | Arcadia (Kynouria)             | 22F                      | 22K                       |
| Koroneiki       | Boeotia (Dilesi)               | 23F                      | 23K                       |
| Agrilia         | Lesvos (Komi)                  | 24F, 24F1, 24F2          | -                         |
| Adramitiani     | Lesvos (Kalloni)               | 25F, 25F1, 25F2          | -                         |
| Kolovi          | Lesvos (Palaiohori)            | 26F, 26F2                | -                         |
| Kolovi          | Lesvos (Moria)                 | 27F                      | -                         |

**Table S2.** Quality Control results

| Compound       | %RSD of<br>Peak Area<br>n=11 | %RSD of<br>tr (min)<br>n=11 | $\Delta m$<br>( $\pm$ error, mDa)<br>n=11 |
|----------------|------------------------------|-----------------------------|-------------------------------------------|
| Oleuropein     | 0.53                         | 0.05                        | -0.08                                     |
| Tyrosol        | 0.48                         | 0.05                        | 0.03                                      |
| Hydroxytyrosol | 0.61                         | 0.06                        | 0.10                                      |

**Table S3.** Target list

| Compound                  | Molecular Formula                               |
|---------------------------|-------------------------------------------------|
| <b>Phenolic acids</b>     |                                                 |
| Caffeic acid              | C <sub>9</sub> H <sub>8</sub> O <sub>4</sub>    |
| Ferulic acid              | C <sub>10</sub> H <sub>10</sub> O <sub>4</sub>  |
| Gallic acid               | C <sub>7</sub> H <sub>6</sub> O <sub>5</sub>    |
| Homovanillic acid         | C <sub>9</sub> H <sub>10</sub> O <sub>4</sub>   |
| p-Coumaric acid           | C <sub>9</sub> H <sub>8</sub> O <sub>3</sub>    |
| Syringic acid             | C <sub>9</sub> H <sub>10</sub> O <sub>5</sub>   |
| <b>Phenolic alcohols</b>  |                                                 |
| Hydroxytyrosol            | C <sub>8</sub> H <sub>10</sub> O <sub>3</sub>   |
| Tyrosol                   | C <sub>8</sub> H <sub>10</sub> O <sub>2</sub>   |
| <b>Phenolic aldehydes</b> |                                                 |
| Vanillin                  | C <sub>8</sub> H <sub>8</sub> O <sub>3</sub>    |
| <b>Flavonoids</b>         |                                                 |
| Apigenin                  | C <sub>15</sub> H <sub>10</sub> O <sub>5</sub>  |
| Epicatechin               | C <sub>15</sub> H <sub>14</sub> O <sub>6</sub>  |
| Luteolin                  | C <sub>15</sub> H <sub>10</sub> O <sub>6</sub>  |
| Quercetin                 | C <sub>15</sub> H <sub>10</sub> O <sub>7</sub>  |
| <b>Secoiridoids</b>       |                                                 |
| Oleuropein                | C <sub>25</sub> H <sub>32</sub> O <sub>13</sub> |
| <b>Lignans</b>            |                                                 |
| Pinoresinol               | C <sub>20</sub> H <sub>22</sub> O <sub>6</sub>  |

Table S4. Suspect list

| Compound                                        | Molecular Formula                               | SMILES                                                                                                                                        |
|-------------------------------------------------|-------------------------------------------------|-----------------------------------------------------------------------------------------------------------------------------------------------|
| <b>Phenolic acids and derivatives</b>           |                                                 |                                                                                                                                               |
| 2,5-Dihydroxybenzoic acid (Gentisic acid)       | C <sub>7</sub> H <sub>6</sub> O <sub>4</sub>    | <chem>OC(=O)C1=CC(O)=CC=C1O</chem>                                                                                                            |
| 3,4-Dihydroxybenzoic acid (Protocatechuic acid) | C <sub>7</sub> H <sub>6</sub> O <sub>4</sub>    | <chem>OC(=O)C1=CC(O)=C(O)C=C1</chem>                                                                                                          |
| Hellicoside                                     | C <sub>29</sub> H <sub>36</sub> O <sub>17</sub> | <chem>c1cc(c(cc1/C=C/C(=O)O[C@@H]2[C@H](O[C@H]([C@@H]([C@H]2O[C@H]3[C@@H]([C@H]([C@@H]([C@H](O3)CO)O)O)O)OC[C@H](c4ccc(c(c4)O)O)CO)O)O</chem> |
| 4-Hydroxybenzoic acid                           | C <sub>7</sub> H <sub>6</sub> O <sub>3</sub>    | <chem>OC(=O)C1=CC=C(O)C=C1</chem>                                                                                                             |
| 4-Hydroxyphenylacetic acid                      | C <sub>8</sub> H <sub>8</sub> O <sub>3</sub>    | <chem>OC(C(O)=O)C1=CC=CC=C1</chem>                                                                                                            |
| Rosmarinic acid                                 | C <sub>18</sub> H <sub>16</sub> O <sub>8</sub>  | <chem>c1cc(c(cc1C[C@H](C(=O)O)OC(=O)/C=C/c2ccc(c(c2)O)O)O)O</chem>                                                                            |
| Vanillic acid                                   | C <sub>8</sub> H <sub>8</sub> O <sub>4</sub>    | <chem>COc1cc(ccc1O)C(=O)O</chem>                                                                                                              |
| Verbascoside                                    | C <sub>29</sub> H <sub>36</sub> O <sub>15</sub> | <chem>CC1OC(OC2C(O)C(OCCC3=CC=C(O)C(O)=C3)OC(CO)C2OC(=O)C=CC2=CC=C(O)C(O)=C2)C(O)C(O)C1O</chem>                                               |
| <b>Phenolic alcohols and derivatives</b>        |                                                 |                                                                                                                                               |
| Calceolarioside                                 | C <sub>23</sub> H <sub>26</sub> O <sub>11</sub> | <chem>OC[C@H]1O[C@@H](OCCC2=CC=C(O)C(O)=C2)[C@H](O)[C@@H](O)[C@@H]1OC(=O)\C=C\C1=CC(O)=C(O)C=C1</chem>                                        |
| Homovanillyl alcohol                            | C <sub>9</sub> H <sub>12</sub> O <sub>3</sub>   | <chem>COC1=CC(CCO)=CC=C1O</chem>                                                                                                              |
| Hydroxytyrosol acetate                          | C <sub>10</sub> H <sub>12</sub> O <sub>4</sub>  | <chem>CC(=O)OCC1=CC(O)=C(O)C=C1</chem>                                                                                                        |
| Hydroxytyrosol glucoside                        | C <sub>14</sub> H <sub>20</sub> O <sub>8</sub>  | <chem>OC[C@H]1O[C@@H](OCCC2=CC(O)=C(O)C=C2)[C@H](O)[C@@H](O)[C@@H]1O</chem>                                                                   |
| Tyrosol glucoside (Salidroside)                 | C <sub>14</sub> H <sub>20</sub> O <sub>7</sub>  | <chem>[H][C@]1(CO)O[C@@]([H])(OCCC2=CC=C(O)C=C2)[C@]([H])(O)[C@@]([H])(O)[C@]1([H])O</chem>                                                   |

| Compound                               | Molecular Formula                               | SMILES                                                                                                                                          |
|----------------------------------------|-------------------------------------------------|-------------------------------------------------------------------------------------------------------------------------------------------------|
| <b>Flavonoids</b>                      |                                                 |                                                                                                                                                 |
| Apigenin-7-O-glucoside                 | C <sub>21</sub> H <sub>20</sub> O <sub>10</sub> | <chem>OC[C@H]1O[C@@H](OC2=CC(O)=C3C(=O)C=C(OC3=C2)C2=CC=C(O)C=C2)[C@H](O)[C@@H](O)[C@@H]1O</chem>                                               |
| Chrysoeriol (Luteolin 3'-methyl ether) | C <sub>16</sub> H <sub>12</sub> O <sub>6</sub>  | <chem>COC1=CC(=CC=C1O)C1=CC(=O)C2=C(O)C=C(O)C=C2O1</chem>                                                                                       |
| Diosmetin                              | C <sub>16</sub> H <sub>12</sub> O <sub>6</sub>  | <chem>COC1=CC=C(C=C1O)C1=CC(=O)C2=C(O)C=C(O)C=C2O1</chem>                                                                                       |
| Diosmin                                | C <sub>28</sub> H <sub>32</sub> O <sub>15</sub> | <chem>COC1=CC=C(C=C1O)C1=CC(=O)C2=C(O)C=C(O[C@@H]3O[C@H](CO[C@@H]4O[C@@H](C)[C@H](O)[C@@H](O)[C@H]4O)[C@@H](O)[C@H](O)[C@H]3O)C=C2O1</chem>     |
| Fustin                                 | C <sub>15</sub> H <sub>12</sub> O <sub>6</sub>  | <chem>c1cc(cc1[C@@H]2[C@H](C=O)c3ccc(cc3O2)O)O)O</chem>                                                                                         |
| Gallocatechin                          | C <sub>15</sub> H <sub>14</sub> O <sub>7</sub>  | <chem>O[C@@H]1CC2=C(O)C=C(O)C=C2O[C@H]1C1=CC(O)=C(O)C(O)=C1</chem>                                                                              |
| Luteolin-7-O-glucoside                 | C <sub>21</sub> H <sub>20</sub> O <sub>11</sub> | <chem>OC[C@@H](O)[C@H]1O[C@@H](OC2=C(OC3=CC(O)=CC(O)=C3C2=O)C2=CC(O)=C(O)C=C2)[C@H](O)[C@H]1O</chem>                                            |
| Luteolin-7,4'-O-diglucoside            | C <sub>27</sub> H <sub>30</sub> O <sub>16</sub> | <chem>OC[C@@H]1O[C@@H](OC2=CC(O)=C3C(=O)C=C(OC3=C2)C2=CC(O[C@@H]3O[C@@H](CO)[C@H](O)[C@@H](O)[C@@H]3O)=C(O)C=C2)[C@@H](O)[C@H](O)[C@H]1O</chem> |
| Naringenin                             | C <sub>15</sub> H <sub>12</sub> O <sub>5</sub>  | <chem>c1cc(ccc1[C@@H]2CC(=O)c3c(cc(cc3O2)O)O)O</chem>                                                                                           |
| Quercetin-3-O-glucoside                | C <sub>21</sub> H <sub>20</sub> O <sub>12</sub> | <chem>OC[C@@H](O)[C@H]1O[C@@H](OC2=C(OC3=CC(O)=CC(O)=C3C2=O)C2=CC(O)=C(O)C=C2)[C@H](O)[C@H]1O</chem>                                            |
| Quercetin-3-O-rutinoside (Rutin)       | C <sub>27</sub> H <sub>30</sub> O <sub>16</sub> | <chem>CC1OC(OCC2OC(OC3=C(OC4=CC(O)=CC(O)=C4C3=O)C3=CC=C(O)C(O)=C3)C(O)C(O)C2O)C(O)C(O)C1O</chem>                                                |
| Taxifolin                              | C <sub>15</sub> H <sub>12</sub> O <sub>7</sub>  | <chem>OC1C(OC2=CC(O)=CC(O)=C2C1=O)C1=CC=C(O)C(O)=C1</chem>                                                                                      |

| Compound                                           | Molecular Formula                               | SMILES                                                                                                                                                |
|----------------------------------------------------|-------------------------------------------------|-------------------------------------------------------------------------------------------------------------------------------------------------------|
| Vicenin-2                                          | C <sub>27</sub> H <sub>30</sub> O <sub>15</sub> | <chem>c1cc(ccc1c2cc(=O)c3c(c(c(c3o2)[C@H]4[C@@H]([C@H]([C@@H]([C@H](O4)CO)O)O)O)[C@H]5[C@@H]([C@H]([C@@H]([C@H](O5)CO)O)O)O)O)O)O</chem>              |
| <b>Secoiridoids</b>                                |                                                 |                                                                                                                                                       |
| Decarboxymethyl ligstroside aglycone (Oleocanthal) | C <sub>17</sub> H <sub>20</sub> O <sub>5</sub>  | <chem>C\C=C(\C=O)[C@@H](CC=O)CC(=O)OCCC1=CC=C(O)C=C1</chem>                                                                                           |
| Decarboxymethyl oleuropein aglycone (Oleacein)     | C <sub>17</sub> H <sub>20</sub> O <sub>6</sub>  | <chem>C\C=C(\C=O)[C@@H](CC=O)CC(=O)OCCC1=CC(O)=C(O)C=C1</chem>                                                                                        |
| Demethyl oleuropein                                | C <sub>24</sub> H <sub>30</sub> O <sub>13</sub> | <chem>C\C=C1\[C@H](O[C@@H]2O[C@H](CO)[C@@H](O)[C@H](O)[C@H]2O)OC=C([C@H]1CC(=O)OCCC1=CC=C(O)C(O)=C1)C(O)=O</chem>                                     |
| Fraxamoside                                        | C <sub>25</sub> H <sub>30</sub> O <sub>13</sub> | <chem>[H][C@@]12CC(=O)OC[C@H](OC[C@H]3O[C@@H](O[C@H](OC=C1C(=O)OC)\C2=C\C)[C@H](O)[C@@H](O)[C@@H]3O)C1=CC(O)=C(O)C=C1</chem>                          |
| 10-Hydroxy-10-Methyl oleuropein aglycone           | C <sub>20</sub> H <sub>24</sub> O <sub>9</sub>  | <chem>COC(=O)C1=CO[C@@H](O)\C(=C/C(C)O)[C@@H]1CC(=O)OCCC1=CC(O)=C(O)C=C1</chem>                                                                       |
| 10-Hydroxy decarboxymethyl oleuropein aglycone     | C <sub>17</sub> H <sub>20</sub> O <sub>7</sub>  | <chem>[H]C(O)\C=C1\C(O)OC=C[C@H]1CC(=O)OCCC1=CC(O)=C(O)C</chem>                                                                                       |
| 10-Hydroxy oleuropein aglycone                     | C <sub>19</sub> H <sub>22</sub> O <sub>9</sub>  | <chem>[H]C(O)\C=C1/[C@H](O)OC=C([C@H]1CC(=O)OCCC1=CC(O)=C(O)C=C1)C(=O)O</chem>                                                                        |
| Ligstroside                                        | C <sub>25</sub> H <sub>32</sub> O <sub>12</sub> | <chem>CC1OC(OC2C(O)C(OCCC3=CC=C(O)C(O)=C3)OC(CO)C2OC(=O)C=CC2=CC=C(O)C(O)=C2)C(O)C(O)C1O</chem>                                                       |
| Ligstroside aglycone                               | C <sub>19</sub> H <sub>22</sub> O <sub>7</sub>  | <chem>COC(=O)C1=CO[C@@H](O)\C(=C\C)[C@@H]1CC(=O)OCCC1=CC=C(O)C=C1</chem>                                                                              |
| Nuzhenide                                          | C <sub>31</sub> H <sub>42</sub> O <sub>17</sub> | <chem>COC(=O)C1=CO[C@@H](O[C@@H]2O[C@H](CO)[C@@H](O)[C@H](O)[C@H]2O)\C(=C/C)C1CC(=O)OC[C@@H]1O[C@H](OCCC2=CC=C(O)C=C2)[C@@H](O)[C@H](O)[C@H]1O</chem> |

| Compound                                                  | Molecular Formula                               | SMILES                                                                                                       |
|-----------------------------------------------------------|-------------------------------------------------|--------------------------------------------------------------------------------------------------------------|
| Oleoside                                                  | C <sub>16</sub> H <sub>22</sub> O <sub>11</sub> | [H][C@]1(CO)O[C@@]([H])(O[C@]2([H])OC=C(C(O)=O)[C@@]([H])(CC(O)=O)\C2=C/C)[C@]([H])(O)[C@@]([H])(O)[C@]1(H)O |
| Oleuropein aglycone                                       | C <sub>19</sub> H <sub>22</sub> O <sub>8</sub>  | COC(=O)C1=CO[C@@H](O)\C(=C\C)[C@@H]1CC(=O)OCCC1=CC(O)=C(O)C=C1                                               |
| Secologanoside                                            | C <sub>16</sub> H <sub>22</sub> O <sub>11</sub> | OC[C@H]1O[C@@H](O[C@@H]2OC=C([C@@H](CC(O)=O)[C@H]2C=C)C(O)=O)[C@H](O)[C@@H](O)[C@@H]1O                       |
| <b>Lignans</b>                                            |                                                 |                                                                                                              |
| Acetoxypinoresinol                                        | C <sub>22</sub> H <sub>24</sub> O <sub>8</sub>  | COC1=C(O)C=CC(=C1)C1OCC2(OC(C)=O)C1COC2C1=CC(OC)=C(O)C=C1                                                    |
| Berchemol                                                 | C <sub>20</sub> H <sub>24</sub> O <sub>7</sub>  | COC1=C(C=CC(=C1)CC2COC(C2(CO)O)C3=CC(=C(C=C3)O)OC)O                                                          |
| Hydroxypinoresinol                                        | C <sub>20</sub> H <sub>22</sub> O <sub>7</sub>  | COC1=C(O)C=CC(=C1)C1OCC2(O)C1COC2C1=CC(OC)=C(O)C=C1                                                          |
| Olivil                                                    | C <sub>20</sub> H <sub>24</sub> O <sub>7</sub>  | COC1=C(O)C=CC(C[C@@]2(O)CO[C@@H]([C@H]2CO)C2=CC(OC)=C(O)C=C2)=C1                                             |
| Syringaresinol                                            | C <sub>22</sub> H <sub>26</sub> O <sub>8</sub>  | COC1=CC(=CC(OC)=C1O)C1OCC2C1COC2C1=CC(OC)=C(O)C(OC)=C1                                                       |
| <b>Hydroxy-isochromans</b>                                |                                                 |                                                                                                              |
| 1-(3'-methoxy-4'-hydroxy)-phenyl-6,7-dihydroxy-isochroman | C <sub>16</sub> H <sub>16</sub> O <sub>5</sub>  | COC1=C(O)C=CC(=C1)C1=C(O)C(O)=CC2=C1COCC2                                                                    |
| 1-phenyl-6,7-dihydroxy-isochroman                         | C <sub>15</sub> H <sub>14</sub> O <sub>3</sub>  | OC1=C(O)C=C2C(OC2=C1)C1=CC=CC=C1                                                                             |
| <b>Triterpenic acids</b>                                  |                                                 |                                                                                                              |
| Maslinic acid                                             | C <sub>30</sub> H <sub>48</sub> O <sub>4</sub>  | CC1(C)CC[C@@]2(CC[C@]3(C)C(=CC[C@@H]4[C@@]5(C)C[C@@H](O)[C@H](O)C(C)(C)[C@@H]5CC[C@@]34C)[C@@H]2C1)C(O)=O    |
| Oleanolic acid                                            | C <sub>30</sub> H <sub>48</sub> O <sub>3</sub>  | CC1(C)CC[C@@]2(CC[C@]3(C)C(=CC[C@@H]4[C@@]5(C)CC[C@H](O)C(C)(C)[C@@H]5CC[C@@]34C)[C@@H]2C1)C(O)=O            |
| <b>Coumarins</b>                                          |                                                 |                                                                                                              |

| Compound                                               | Molecular Formula                               | SMILES                                                                                               |
|--------------------------------------------------------|-------------------------------------------------|------------------------------------------------------------------------------------------------------|
| Aesculin                                               | C <sub>15</sub> H <sub>15</sub> O <sub>9</sub>  | <chem>OC[C@H]1O[C@@H](OC2=C(O)C=C3OC(=O)C=CC3=C2)[C@H](O)[C@@H](O)[C@@H]1O</chem>                    |
| Cichoriin                                              | C <sub>15</sub> H <sub>16</sub> O <sub>9</sub>  | <chem>C1=CC(=O)OC2=CC(=C(C=C21)O)OC3C(C(C(C(O3)CO)O)O)O</chem>                                       |
| Esculetin                                              | C <sub>9</sub> H <sub>6</sub> O <sub>4</sub>    | <chem>C1=CC(=O)OC2=CC(=C(C=C21)O)O</chem>                                                            |
| Scopoletin                                             | C <sub>10</sub> H <sub>8</sub> O <sub>4</sub>   | <chem>COC1=C(C=C2C(=C1)C=CC(=O)O2)O</chem>                                                           |
| <b>Other compounds</b>                                 |                                                 |                                                                                                      |
| Abscisic acid                                          | C <sub>15</sub> H <sub>20</sub> O <sub>4</sub>  | <chem>C\C(\C=C\ [C@@]1(O)C(C)=CC(=O)CC1(C)C)=C\C(O)=O</chem>                                         |
| Azelaic acid                                           | C <sub>9</sub> H <sub>16</sub> O <sub>4</sub>   | <chem>OC(=O)CCCCCCCC(O)=O</chem>                                                                     |
| Elenolic acid                                          | C <sub>11</sub> H <sub>14</sub> O <sub>6</sub>  | <chem>COC(=O)C1=CO[C@@H](C)[C@@H](C=O)[C@@H]1CC(O)=O</chem>                                          |
| Elenolic acid 2-O-glucoside (Oleoside 11-methyl ester) | C <sub>17</sub> H <sub>24</sub> O <sub>11</sub> | <chem>COC(=O)C1=CO[C@@H](O[C@@H]2O[C@H](CO)[C@@H](O)[C@H](O)[C@H]2O)\C(=C\C)[C@@H]1CC(O)=O</chem>    |
| Elenolic acid methyl ester                             | C <sub>12</sub> H <sub>16</sub> O <sub>6</sub>  | <chem>COC(=O)C[C@H]1[C@H](C=O)[C@H](C)OC=C1C(=O)OC</chem>                                            |
| Hydroxylated form of elenolic acid                     | C <sub>11</sub> H <sub>14</sub> O <sub>7</sub>  | <chem>COC(=O)C1=CO[C@@H](CO)[C@@H](C=O)[C@@H]1CC(O)=O</chem>                                         |
| Licodione                                              | C <sub>15</sub> H <sub>12</sub> O <sub>5</sub>  | <chem>OC1=CC=C(C=C1)C(=O)CC(=O)C1=CC=C(O)C=C1O</chem>                                                |
| Suspensaside                                           | C <sub>29</sub> H <sub>36</sub> O <sub>16</sub> | <chem>CC1C(C(C(C(O1)OCC2C(C(C(C(O2)OCC(C3=CC(=C(C=C3)O)O)O)O)OC(=O)C=CC4=CC(=C(C=C4)O)O)O)O)O</chem> |

SMILES: simplified molecular-input line-entry system



Table S5. Suspect screening results

| Compound                                 | Molecular Formula                               | [M-H] <sup>-</sup> m/z calc. | [M-H] <sup>-</sup> m/z exp. | t <sub>R</sub> exp. (min) | t <sub>R</sub> QSRR (min) | Fragments m/z | Elemental Formula                              | Peak score A/I | Leaf     | Drupe    | Level Ident. |
|------------------------------------------|-------------------------------------------------|------------------------------|-----------------------------|---------------------------|---------------------------|---------------|------------------------------------------------|----------------|----------|----------|--------------|
| <b>Phenolic acids and derivatives</b>    |                                                 |                              |                             |                           |                           |               |                                                |                |          |          |              |
| 4-Hydroxybenzoic acid                    | C <sub>7</sub> H <sub>6</sub> O <sub>3</sub>    | 137.0244                     | 137.0243                    | 4.00                      | 4.45                      | 71.0139       | C <sub>3</sub> H <sub>3</sub> O <sub>2</sub>   | 16             | Detected | -        | 2a           |
|                                          |                                                 |                              |                             |                           |                           | 108.0217      | C <sub>6</sub> H <sub>4</sub> O <sub>2</sub>   |                |          |          |              |
|                                          |                                                 |                              |                             |                           |                           | 123.0088      | C <sub>6</sub> H <sub>3</sub> O <sub>3</sub>   |                |          |          |              |
| 4-Hydroxyphenylacetic acid               | C <sub>8</sub> H <sub>8</sub> O <sub>3</sub>    | 151.0400                     | 151.0402                    | 3.44                      | 4.00                      | 71.0135       | C <sub>3</sub> H <sub>3</sub> O <sub>2</sub>   | 13             | Detected | Detected | 2a           |
|                                          |                                                 |                              |                             |                           |                           | 81.0341       | C <sub>5</sub> H <sub>5</sub> O                |                |          |          |              |
|                                          |                                                 |                              |                             |                           |                           | 95.0499       | C <sub>6</sub> H <sub>7</sub> O                |                |          |          |              |
|                                          |                                                 |                              |                             |                           |                           | 108.0215      | C <sub>6</sub> H <sub>4</sub> O <sub>2</sub>   |                |          |          |              |
|                                          |                                                 |                              |                             |                           |                           | 123.0448      | C <sub>7</sub> H <sub>7</sub> O <sub>2</sub>   |                |          |          |              |
| Vanillic acid                            | C <sub>8</sub> H <sub>8</sub> O <sub>4</sub>    | 167.0349                     | 167.0344                    | 1.43                      | -                         | 71.0131       | C <sub>3</sub> H <sub>3</sub> O <sub>2</sub>   | 11             | Detected | Detected | 1            |
|                                          |                                                 |                              |                             |                           |                           | 93.0364       | C <sub>6</sub> H <sub>5</sub> O                |                |          |          |              |
|                                          |                                                 |                              |                             |                           |                           | 123.0454      | C <sub>7</sub> H <sub>7</sub> O <sub>2</sub>   |                |          |          |              |
|                                          |                                                 |                              |                             |                           |                           | 137.0257      | C <sub>7</sub> H <sub>5</sub> O <sub>3</sub>   |                |          |          |              |
|                                          |                                                 |                              |                             |                           |                           | 149.0209      | C <sub>8</sub> H <sub>5</sub> O <sub>3</sub>   |                |          |          |              |
| Verbascoside                             | C <sub>29</sub> H <sub>36</sub> O <sub>15</sub> | 623.1981                     | 623.1983                    | 5.00                      | 6.91                      | 113.0242      | C <sub>5</sub> H <sub>5</sub> O <sub>3</sub>   | 7              | Detected | Detected | 2a           |
|                                          |                                                 |                              |                             |                           |                           | 133.0292      | C <sub>8</sub> H <sub>5</sub> O <sub>2</sub>   |                |          |          |              |
|                                          |                                                 |                              |                             |                           |                           | 153.0566      | C <sub>8</sub> H <sub>9</sub> O <sub>3</sub>   |                |          |          |              |
|                                          |                                                 |                              |                             |                           |                           | 161.0250      | C <sub>9</sub> H <sub>5</sub> O <sub>3</sub>   |                |          |          |              |
|                                          |                                                 |                              |                             |                           |                           | 179.0351      | C <sub>9</sub> H <sub>7</sub> O <sub>4</sub>   |                |          |          |              |
|                                          |                                                 |                              |                             |                           |                           | 241.0714      | C <sub>11</sub> H <sub>13</sub> O <sub>6</sub> |                |          |          |              |
|                                          |                                                 |                              |                             |                           |                           | 275.0569      | C <sub>14</sub> H <sub>11</sub> O <sub>6</sub> |                |          |          |              |
|                                          |                                                 |                              |                             |                           |                           | 315.1109      | C <sub>14</sub> H <sub>19</sub> O <sub>8</sub> |                |          |          |              |
| 461.1676                                 | C <sub>20</sub> H <sub>29</sub> O <sub>12</sub> |                              |                             |                           |                           |               |                                                |                |          |          |              |
| <b>Phenolic alcohols and derivatives</b> |                                                 |                              |                             |                           |                           |               |                                                |                |          |          |              |

| Compound                        | Molecular Formula                               | [M-H] <sup>-</sup> m/z calc. | [M-H] <sup>-</sup> m/z exp. | t <sub>R</sub> exp. (min) | t <sub>R</sub> QSRR (min) | Fragments m/z                                                                                           | Elemental Formula                                                                                                                                                                                                                                                                                                                                                                                                                  | Peak score A/I | Leaf     | Drupe    | Level Ident. |
|---------------------------------|-------------------------------------------------|------------------------------|-----------------------------|---------------------------|---------------------------|---------------------------------------------------------------------------------------------------------|------------------------------------------------------------------------------------------------------------------------------------------------------------------------------------------------------------------------------------------------------------------------------------------------------------------------------------------------------------------------------------------------------------------------------------|----------------|----------|----------|--------------|
| Calceolarioside                 | C <sub>23</sub> H <sub>26</sub> O <sub>11</sub> | 477.1402                     | 477.1406                    | 5.69                      | 7.64                      | 217.0502<br>285.0977                                                                                    | C <sub>12</sub> H <sub>9</sub> O <sub>4</sub><br>C <sub>13</sub> H <sub>17</sub> O <sub>7</sub>                                                                                                                                                                                                                                                                                                                                    | 8              | Detected | Detected | 2a           |
| Hydroxytyrosol acetate          | C <sub>10</sub> H <sub>12</sub> O <sub>4</sub>  | 195.0660                     | 195.0664                    | 6.65                      | 6.48                      | 59.0139<br>121.0295<br>149.0608                                                                         | C <sub>2</sub> H <sub>3</sub> O <sub>2</sub><br>C <sub>7</sub> H <sub>5</sub> O <sub>2</sub><br>C <sub>9</sub> H <sub>9</sub> O <sub>2</sub>                                                                                                                                                                                                                                                                                       | 13             | Detected | Detected | 2a           |
| Hydroxytyrosol glucoside        | C <sub>14</sub> H <sub>20</sub> O <sub>8</sub>  | 315.1085                     | 315.1085                    | 3.88                      | 4.15                      | 71.0132<br>105.0337<br>113.0228<br>119.0337<br>123.0447<br>135.0446<br>153.0549<br>179.0578<br>240.0601 | C <sub>3</sub> H <sub>3</sub> O <sub>2</sub><br>C <sub>7</sub> H <sub>5</sub> O<br>C <sub>5</sub> H <sub>5</sub> O <sub>3</sub><br>C <sub>3</sub> H <sub>8</sub> O <sub>4</sub><br>C <sub>7</sub> H <sub>7</sub> O <sub>2</sub><br>C <sub>8</sub> H <sub>7</sub> O <sub>2</sub><br>C <sub>8</sub> H <sub>9</sub> O <sub>3</sub><br>C <sub>6</sub> H <sub>11</sub> O <sub>6</sub><br>C <sub>11</sub> H <sub>13</sub> O <sub>6</sub> | 13             | Detected | Detected | 2a           |
| Tyrosol glucoside (Salidroside) | C <sub>14</sub> H <sub>20</sub> O <sub>7</sub>  | 299.1136                     | 299.1135                    | 3.94                      | 4.92                      | 71.0134<br>113.0222<br>137.0599                                                                         | C <sub>3</sub> H <sub>3</sub> O <sub>2</sub><br>C <sub>5</sub> H <sub>5</sub> O <sub>3</sub><br>C <sub>8</sub> H <sub>9</sub> O <sub>2</sub>                                                                                                                                                                                                                                                                                       | 9              | Detected | Detected | 2a           |
| <b>Flavonoids</b>               |                                                 |                              |                             |                           |                           |                                                                                                         |                                                                                                                                                                                                                                                                                                                                                                                                                                    |                |          |          |              |
| Apigenin-7-O-glucoside          | C <sub>21</sub> H <sub>20</sub> O <sub>10</sub> | 431.0983                     | 431.0987                    | 5.92                      | 5.38                      | 67.0188<br>111.0086<br>143.0353<br>151.0037<br>269.0444<br>300.0276<br>311.0555                         | C <sub>4</sub> H <sub>3</sub> O<br>C <sub>5</sub> H <sub>3</sub> O <sub>3</sub><br>C <sub>6</sub> H <sub>7</sub> O <sub>4</sub><br>C <sub>8</sub> H <sub>5</sub> O <sub>3</sub><br>C <sub>15</sub> H <sub>9</sub> O <sub>5</sub><br>C <sub>15</sub> H <sub>8</sub> O <sub>7</sub><br>C <sub>17</sub> H <sub>11</sub> O <sub>6</sub>                                                                                                | 7              | Detected | Detected | 2a           |

| Compound                               | Molecular Formula                               | [M-H] <sup>-</sup> m/z calc. | [M-H] <sup>-</sup> m/z exp. | t <sub>R</sub> exp. (min) | t <sub>R</sub> QSRR (min) | Fragments m/z | Elemental Formula                               | Peak score A/I | Leaf     | Drupe    | Level Ident. |
|----------------------------------------|-------------------------------------------------|------------------------------|-----------------------------|---------------------------|---------------------------|---------------|-------------------------------------------------|----------------|----------|----------|--------------|
| Chrysoeriol (Luteolin 3'-methyl ether) | C <sub>16</sub> H <sub>12</sub> O <sub>6</sub>  | 299.0561                     | 299.0560                    | 8.24                      | 7.41                      | 83.0138       | C <sub>4</sub> H <sub>3</sub> O <sub>2</sub>    | 10             | Detected | Detected | 2a           |
|                                        |                                                 |                              |                             |                           |                           | 107.0139      | C <sub>6</sub> H <sub>3</sub> O <sub>2</sub>    |                |          |          |              |
|                                        |                                                 |                              |                             |                           |                           | 134.0352      | C <sub>8</sub> H <sub>6</sub> O <sub>2</sub>    |                |          |          |              |
|                                        |                                                 |                              |                             |                           |                           | 151.0024      | C <sub>7</sub> H <sub>3</sub> O <sub>4</sub>    |                |          |          |              |
|                                        |                                                 |                              |                             |                           |                           | 158.0369      | C <sub>10</sub> H <sub>6</sub> O <sub>2</sub>   |                |          |          |              |
|                                        |                                                 |                              |                             |                           |                           | 200.0464      | C <sub>12</sub> H <sub>8</sub> O <sub>3</sub>   |                |          |          |              |
|                                        |                                                 |                              |                             |                           |                           | 227.0345      | C <sub>13</sub> H <sub>7</sub> O <sub>4</sub>   |                |          |          |              |
|                                        |                                                 |                              |                             |                           |                           | 256.0376      | C <sub>14</sub> H <sub>8</sub> O <sub>5</sub>   |                |          |          |              |
| 284.0327                               | C <sub>15</sub> H <sub>8</sub> O <sub>6</sub>   |                              |                             |                           |                           |               |                                                 |                |          |          |              |
| Diosmin                                | C <sub>28</sub> H <sub>32</sub> O <sub>15</sub> | 607.1668                     | 607.1669                    | 5.70                      | 6.00                      | 89.0242       | C <sub>3</sub> H <sub>5</sub> O <sub>3</sub>    | 5              | Detected | Detected | 2a           |
|                                        |                                                 |                              |                             |                           |                           | 151.0401      | C <sub>8</sub> H <sub>7</sub> O <sub>3</sub>    |                |          |          |              |
|                                        |                                                 |                              |                             |                           |                           | 162.0524      | C <sub>6</sub> H <sub>10</sub> O <sub>5</sub>   |                |          |          |              |
|                                        |                                                 |                              |                             |                           |                           | 171.0296      | C <sub>7</sub> H <sub>7</sub> O <sub>5</sub>    |                |          |          |              |
|                                        |                                                 |                              |                             |                           |                           | 216.0404      | C <sub>12</sub> H <sub>8</sub> O <sub>4</sub>   |                |          |          |              |
|                                        |                                                 |                              |                             |                           |                           | 233.0664      | C <sub>9</sub> H <sub>13</sub> O <sub>7</sub>   |                |          |          |              |
|                                        |                                                 |                              |                             |                           |                           | 256.0374      | C <sub>14</sub> H <sub>8</sub> O <sub>5</sub>   |                |          |          |              |
|                                        |                                                 |                              |                             |                           |                           | 275.0768      | C <sub>11</sub> H <sub>15</sub> O <sub>8</sub>  |                |          |          |              |
|                                        |                                                 |                              |                             |                           |                           | 284.0307      | C <sub>15</sub> H <sub>8</sub> O <sub>6</sub>   |                |          |          |              |
|                                        |                                                 |                              |                             |                           |                           | 299.0537      | C <sub>16</sub> H <sub>11</sub> O <sub>6</sub>  |                |          |          |              |
|                                        |                                                 |                              |                             |                           |                           | 301.0351      | C <sub>15</sub> H <sub>9</sub> O <sub>7</sub>   |                |          |          |              |
|                                        |                                                 |                              |                             |                           |                           | 307.1014      | C <sub>12</sub> H <sub>19</sub> O <sub>9</sub>  |                |          |          |              |
|                                        |                                                 |                              |                             |                           |                           | 343.0448      | C <sub>17</sub> H <sub>11</sub> O <sub>8</sub>  |                |          |          |              |
|                                        |                                                 |                              |                             |                           |                           | 397.1134      | C <sub>18</sub> H <sub>21</sub> O <sub>10</sub> |                |          |          |              |
| 444.1261                               | C <sub>19</sub> H <sub>24</sub> O <sub>12</sub> |                              |                             |                           |                           |               |                                                 |                |          |          |              |

| Compound               | Molecular Formula                               | [M-H] <sup>-</sup> m/z calc. | [M-H] <sup>-</sup> m/z exp. | t <sub>R</sub> exp. (min) | t <sub>R</sub> QSRR (min) | Fragments m/z               | Elemental Formula                               | Peak score A/I | Leaf     | Drupe    | Level Ident. |
|------------------------|-------------------------------------------------|------------------------------|-----------------------------|---------------------------|---------------------------|-----------------------------|-------------------------------------------------|----------------|----------|----------|--------------|
| Fustin                 | C <sub>15</sub> H <sub>12</sub> O <sub>6</sub>  | 287.0561                     | 287.0560                    | 6.27                      | 5.77                      | 83.0133                     | C <sub>4</sub> H <sub>3</sub> O <sub>2</sub>    | 9              | Detected | Detected | 2a           |
|                        |                                                 |                              |                             |                           |                           | 107.0137                    | C <sub>6</sub> H <sub>3</sub> O <sub>2</sub>    |                |          |          |              |
|                        |                                                 |                              |                             |                           |                           | 125.0240                    | C <sub>6</sub> H <sub>5</sub> O <sub>3</sub>    |                |          |          |              |
|                        |                                                 |                              |                             |                           |                           | 135.0446                    | C <sub>8</sub> H <sub>7</sub> O <sub>2</sub>    |                |          |          |              |
|                        |                                                 |                              |                             |                           |                           | 151.0031                    | C <sub>7</sub> H <sub>3</sub> O <sub>4</sub>    |                |          |          |              |
|                        |                                                 |                              |                             |                           |                           | 161.0236                    | C <sub>9</sub> H <sub>5</sub> O <sub>3</sub>    |                |          |          |              |
|                        |                                                 |                              |                             |                           |                           | 169.0133                    | C <sub>7</sub> H <sub>5</sub> O <sub>5</sub>    |                |          |          |              |
|                        |                                                 |                              |                             |                           |                           | 177.0181                    | C <sub>9</sub> H <sub>5</sub> O <sub>4</sub>    |                |          |          |              |
|                        |                                                 |                              |                             |                           |                           | 185.0252                    | C <sub>11</sub> H <sub>5</sub> O <sub>3</sub>   |                |          |          |              |
|                        |                                                 |                              |                             |                           |                           | 203.0352                    | C <sub>11</sub> H <sub>7</sub> O <sub>4</sub>   |                |          |          |              |
| 269.0462               | C <sub>15</sub> H <sub>9</sub> O <sub>5</sub>   |                              |                             |                           |                           |                             |                                                 |                |          |          |              |
| Luteolin-7-O-glucoside | C <sub>21</sub> H <sub>20</sub> O <sub>11</sub> | 447.0932                     | 447.0933                    | 5.41                      | 5.07                      | 59.0135                     | C <sub>2</sub> H <sub>3</sub> O <sub>2</sub>    | 16             | Detected | Detected | 2a           |
|                        |                                                 |                              |                             |                           |                           | 133.0289                    | C <sub>8</sub> H <sub>5</sub> O <sub>2</sub>    |                |          |          |              |
|                        |                                                 |                              |                             |                           |                           | 151.0033                    | C <sub>7</sub> H <sub>3</sub> O <sub>4</sub>    |                |          |          |              |
|                        |                                                 |                              |                             |                           |                           | 169.0137                    | C <sub>7</sub> H <sub>5</sub> O <sub>5</sub>    |                |          |          |              |
|                        |                                                 |                              |                             |                           |                           | 211.0387                    | C <sub>13</sub> H <sub>7</sub> O <sub>3</sub>   |                |          |          |              |
|                        |                                                 |                              |                             |                           |                           | 227.0330                    | C <sub>13</sub> H <sub>7</sub> O <sub>4</sub>   |                |          |          |              |
|                        |                                                 |                              |                             |                           |                           | 256.0386                    | C <sub>14</sub> H <sub>8</sub> O <sub>5</sub>   |                |          |          |              |
|                        |                                                 |                              |                             |                           |                           | 285.0399                    | C <sub>15</sub> H <sub>9</sub> O <sub>6</sub>   |                |          |          |              |
|                        |                                                 |                              |                             |                           |                           | 327.0497                    | C <sub>17</sub> H <sub>11</sub> O <sub>7</sub>  |                |          |          |              |
|                        |                                                 |                              |                             |                           |                           | Luteolin-7,4'-O-diglucoside | C <sub>27</sub> H <sub>30</sub> O <sub>16</sub> |                |          |          |              |
| 151.0027               | C <sub>7</sub> H <sub>3</sub> O <sub>4</sub>    |                              |                             |                           |                           |                             |                                                 |                |          |          |              |
| 178.9983               | C <sub>8</sub> H <sub>3</sub> O <sub>5</sub>    |                              |                             |                           |                           |                             |                                                 |                |          |          |              |
| 255.0297               | C <sub>14</sub> H <sub>7</sub> O <sub>5</sub>   |                              |                             |                           |                           |                             |                                                 |                |          |          |              |
| 271.0252               | C <sub>14</sub> H <sub>7</sub> O <sub>6</sub>   |                              |                             |                           |                           |                             |                                                 |                |          |          |              |
| 300.0282               | C <sub>15</sub> H <sub>8</sub> O <sub>7</sub>   |                              |                             |                           |                           |                             |                                                 |                |          |          |              |
| 343.0469               | C <sub>17</sub> H <sub>11</sub> O <sub>8</sub>  |                              |                             |                           |                           |                             |                                                 |                |          |          |              |

| Compound                         | Molecular Formula                               | [M-H] <sup>-</sup> m/z calc. | [M-H] <sup>-</sup> m/z exp. | t <sub>R</sub> exp. (min) | t <sub>R</sub> QSRR (min) | Fragments m/z | Elemental Formula                               | Peak score A/I | Leaf     | Drupe    | Level Ident. |
|----------------------------------|-------------------------------------------------|------------------------------|-----------------------------|---------------------------|---------------------------|---------------|-------------------------------------------------|----------------|----------|----------|--------------|
| Naringenin                       | C <sub>15</sub> H <sub>12</sub> O <sub>5</sub>  | 271.0611                     | 271.0616                    | 7.41                      | 7.48                      | 591.1407      | C <sub>27</sub> H <sub>27</sub> O <sub>15</sub> | 6              | Detected | -        | 2a           |
|                                  |                                                 |                              |                             |                           |                           | 119.0504      | C <sub>8</sub> H <sub>7</sub> O                 |                |          |          |              |
|                                  |                                                 |                              |                             |                           |                           | 145.0294      | C <sub>9</sub> H <sub>5</sub> O <sub>2</sub>    |                |          |          |              |
|                                  |                                                 |                              |                             |                           |                           | 173.0242      | C <sub>10</sub> H <sub>5</sub> O <sub>3</sub>   |                |          |          |              |
|                                  |                                                 |                              |                             |                           |                           | 177.0163      | C <sub>9</sub> H <sub>5</sub> O <sub>4</sub>    |                |          |          |              |
| 187.0369                         | C <sub>11</sub> H <sub>7</sub> O <sub>3</sub>   |                              |                             |                           |                           |               |                                                 |                |          |          |              |
| Quercetin-3-O-rutinoside (Rutin) | C <sub>27</sub> H <sub>30</sub> O <sub>16</sub> | 609.1461                     | 609.1465                    | 4.61                      | 4.26                      | 113.0233      | C <sub>5</sub> H <sub>5</sub> O <sub>3</sub>    | 12             | Detected | Detected | 2a           |
|                                  |                                                 |                              |                             |                           |                           | 151.0027      | C <sub>7</sub> H <sub>3</sub> O <sub>4</sub>    |                |          |          |              |
|                                  |                                                 |                              |                             |                           |                           | 161.0435      | C <sub>6</sub> H <sub>9</sub> O <sub>5</sub>    |                |          |          |              |
|                                  |                                                 |                              |                             |                           |                           | 272.0300      | C <sub>14</sub> H <sub>8</sub> O <sub>6</sub>   |                |          |          |              |
|                                  |                                                 |                              |                             |                           |                           | 300.0282      | C <sub>15</sub> H <sub>8</sub> O <sub>7</sub>   |                |          |          |              |
|                                  |                                                 |                              |                             |                           |                           | 343.0469      | C <sub>17</sub> H <sub>11</sub> O <sub>8</sub>  |                |          |          |              |
|                                  |                                                 |                              |                             |                           |                           | 447.0923      | C <sub>21</sub> H <sub>19</sub> O <sub>11</sub> |                |          |          |              |
| Taxifolin                        | C <sub>15</sub> H <sub>12</sub> O <sub>7</sub>  | 303.0510                     | 303.0517                    | 4.86                      | -                         | 83.0136       | C <sub>4</sub> H <sub>3</sub> O <sub>2</sub>    | 5              | Detected | -        | 1            |
|                                  |                                                 |                              |                             |                           |                           | 123.0445      | C <sub>7</sub> H <sub>7</sub> O <sub>2</sub>    |                |          |          |              |
|                                  |                                                 |                              |                             |                           |                           | 125.0245      | C <sub>6</sub> H <sub>5</sub> O <sub>3</sub>    |                |          |          |              |
|                                  |                                                 |                              |                             |                           |                           | 137.0232      | C <sub>7</sub> H <sub>5</sub> O <sub>3</sub>    |                |          |          |              |
|                                  |                                                 |                              |                             |                           |                           | 151.0047      | C <sub>7</sub> H <sub>3</sub> O <sub>4</sub>    |                |          |          |              |
|                                  |                                                 |                              |                             |                           |                           | 175.0393      | C <sub>10</sub> H <sub>7</sub> O <sub>3</sub>   |                |          |          |              |
|                                  |                                                 |                              |                             |                           |                           | 193.0513      | C <sub>10</sub> H <sub>9</sub> O <sub>4</sub>   |                |          |          |              |
|                                  |                                                 |                              |                             |                           |                           | 217.0515      | C <sub>12</sub> H <sub>9</sub> O <sub>4</sub>   |                |          |          |              |
|                                  |                                                 |                              |                             |                           |                           | 285.0450      | C <sub>15</sub> H <sub>9</sub> O <sub>6</sub>   |                |          |          |              |
|                                  |                                                 |                              |                             |                           |                           | Vicenin-2     | C <sub>27</sub> H <sub>30</sub> O <sub>15</sub> |                |          |          |              |
| 325.0698                         | C <sub>18</sub> H <sub>13</sub> O <sub>6</sub>  |                              |                             |                           |                           |               |                                                 |                |          |          |              |
| 353.0661                         | C <sub>19</sub> H <sub>13</sub> O <sub>7</sub>  |                              |                             |                           |                           |               |                                                 |                |          |          |              |
| 383.0755                         | C <sub>20</sub> H <sub>15</sub> O <sub>8</sub>  |                              |                             |                           |                           |               |                                                 |                |          |          |              |

| Compound                                        | Molecular Formula                               | [M-H] <sup>-</sup> m/z calc. | [M-H] <sup>-</sup> m/z exp. | t <sub>R</sub> exp. (min) | t <sub>R</sub> QSRR (min) | Fragments m/z | Elemental Formula                               | Peak score A/I | Leaf     | Drupe    | Level Ident. |
|-------------------------------------------------|-------------------------------------------------|------------------------------|-----------------------------|---------------------------|---------------------------|---------------|-------------------------------------------------|----------------|----------|----------|--------------|
|                                                 |                                                 |                              |                             |                           |                           | 413.0889      | C <sub>21</sub> H <sub>17</sub> O <sub>9</sub>  |                |          |          |              |
|                                                 |                                                 |                              |                             |                           |                           | 473.1113      | C <sub>23</sub> H <sub>21</sub> O <sub>11</sub> |                |          |          |              |
|                                                 |                                                 |                              |                             |                           |                           | 503.1198      | C <sub>24</sub> H <sub>23</sub> O <sub>12</sub> |                |          |          |              |
|                                                 |                                                 |                              |                             |                           |                           | 575.1431      | C <sub>27</sub> H <sub>27</sub> O <sub>14</sub> |                |          |          |              |
| <b>Secoiridoids</b>                             |                                                 |                              |                             |                           |                           |               |                                                 |                |          |          |              |
| Decarboxymethyl<br>ligstroside<br>(Oleocanthal) | C <sub>17</sub> H <sub>20</sub> O <sub>5</sub>  | 303.1237                     | 303.1239                    | 6.47                      | 6.76                      | 69.0343       | C <sub>4</sub> H <sub>5</sub> O                 | 4              | -        | Detected | 2a           |
|                                                 |                                                 |                              |                             |                           |                           | 95.0498       | C <sub>6</sub> H <sub>7</sub> O                 |                |          |          |              |
|                                                 |                                                 |                              |                             |                           |                           | 113.0235      | C <sub>5</sub> H <sub>5</sub> O <sub>3</sub>    |                |          |          |              |
|                                                 |                                                 |                              |                             |                           |                           | 121.0294      | C <sub>7</sub> H <sub>5</sub> O <sub>2</sub>    |                |          |          |              |
|                                                 |                                                 |                              |                             |                           |                           | 123.0448      | C <sub>7</sub> H <sub>7</sub> O <sub>2</sub>    |                |          |          |              |
|                                                 |                                                 |                              |                             |                           |                           | 137.0598      | C <sub>8</sub> H <sub>9</sub> O <sub>2</sub>    |                |          |          |              |
|                                                 |                                                 |                              |                             |                           |                           | 165.0553      | C <sub>9</sub> H <sub>9</sub> O <sub>3</sub>    |                |          |          |              |
|                                                 |                                                 |                              |                             |                           |                           | 183.0661      | C <sub>9</sub> H <sub>11</sub> O <sub>4</sub>   |                |          |          |              |
|                                                 |                                                 |                              |                             |                           |                           | 233.0819      | C <sub>13</sub> H <sub>13</sub> O <sub>4</sub>  |                |          |          |              |
| Decarboxymethyl<br>oleuropein<br>(Oleacein)     | C <sub>17</sub> H <sub>20</sub> O <sub>6</sub>  | 319.1185                     | 319.1188                    | 5.69                      | 6.14                      | 69.0346       | C <sub>4</sub> H <sub>5</sub> O                 | 11             | Detected | Detected | 2a           |
|                                                 |                                                 |                              |                             |                           |                           | 95.0499       | C <sub>6</sub> H <sub>7</sub> O                 |                |          |          |              |
|                                                 |                                                 |                              |                             |                           |                           | 113.0227      | C <sub>5</sub> H <sub>5</sub> O <sub>3</sub>    |                |          |          |              |
|                                                 |                                                 |                              |                             |                           |                           | 123.0448      | C <sub>7</sub> H <sub>7</sub> O <sub>2</sub>    |                |          |          |              |
|                                                 |                                                 |                              |                             |                           |                           | 139.0390      | C <sub>7</sub> H <sub>7</sub> O <sub>3</sub>    |                |          |          |              |
|                                                 |                                                 |                              |                             |                           |                           | 139.0757      | C <sub>8</sub> H <sub>11</sub> O <sub>2</sub>   |                |          |          |              |
|                                                 |                                                 |                              |                             |                           |                           | 165.0541      | C <sub>9</sub> H <sub>9</sub> O <sub>3</sub>    |                |          |          |              |
|                                                 |                                                 |                              |                             |                           |                           | 183.0658      | C <sub>9</sub> H <sub>11</sub> O <sub>4</sub>   |                |          |          |              |
| Demethyl oleuropein                             | C <sub>24</sub> H <sub>30</sub> O <sub>13</sub> | 525.1613                     | 525.1616                    | 4.21                      | 4.31                      | 163.0374      | C <sub>9</sub> H <sub>7</sub> O <sub>3</sub>    | 14             | Detected | Detected | 2b           |
|                                                 |                                                 |                              |                             |                           |                           | 389.1023      | C <sub>16</sub> H <sub>21</sub> O <sub>11</sub> |                |          |          |              |

| Compound                                       | Molecular Formula                               | [M-H] <sup>-</sup> m/z calc. | [M-H] <sup>-</sup> m/z exp. | tr exp. (min) | tr QSRR (min) | Fragments m/z | Elemental Formula                              | Peak score A/I | Leaf     | Drupe    | Level Ident. |
|------------------------------------------------|-------------------------------------------------|------------------------------|-----------------------------|---------------|---------------|---------------|------------------------------------------------|----------------|----------|----------|--------------|
| Fraxamoside                                    | C <sub>25</sub> H <sub>30</sub> O <sub>13</sub> | 537.1613                     | 537.1616                    | 4.35          | 5.16          | 133.0293      | C <sub>8</sub> H <sub>5</sub> O <sub>2</sub>   | 9              | Detected | Detected | 2a           |
|                                                |                                                 |                              |                             |               |               | 161.0238      | C <sub>9</sub> H <sub>5</sub> O <sub>3</sub>   |                |          |          |              |
|                                                |                                                 |                              |                             |               |               | 165.0547      | C <sub>9</sub> H <sub>9</sub> O <sub>3</sub>   |                |          |          |              |
|                                                |                                                 |                              |                             |               |               | 179.0335      | C <sub>9</sub> H <sub>7</sub> O <sub>4</sub>   |                |          |          |              |
|                                                |                                                 |                              |                             |               |               | 205.0501      | C <sub>11</sub> H <sub>9</sub> O <sub>4</sub>  |                |          |          |              |
|                                                |                                                 |                              |                             |               |               | 221.0472      | C <sub>11</sub> H <sub>9</sub> O <sub>5</sub>  |                |          |          |              |
|                                                |                                                 |                              |                             |               |               | 235.0597      | C <sub>12</sub> H <sub>11</sub> O <sub>5</sub> |                |          |          |              |
| 323.0777                                       | C <sub>15</sub> H <sub>15</sub> O <sub>8</sub>  |                              |                             |               |               |               |                                                |                |          |          |              |
| 10-Hydroxy-10-Methyl oleuropein aglycone       | C <sub>20</sub> H <sub>24</sub> O <sub>9</sub>  | 407.1347                     | 407.1350                    | 6.60          | 6.75          | 111.0087      | C <sub>5</sub> H <sub>3</sub> O <sub>3</sub>   | 10             | Detected | Detected | 2b           |
|                                                |                                                 |                              |                             |               |               | 121.0295      | C <sub>7</sub> H <sub>5</sub> O <sub>2</sub>   |                |          |          |              |
|                                                |                                                 |                              |                             |               |               | 179.0351      | C <sub>9</sub> H <sub>7</sub> O <sub>4</sub>   |                |          |          |              |
|                                                |                                                 |                              |                             |               |               | 241.0871      | C <sub>15</sub> H <sub>13</sub> O <sub>3</sub> |                |          |          |              |
| 10-Hydroxy decarboxymethyl oleuropein aglycone | C <sub>17</sub> H <sub>20</sub> O <sub>7</sub>  | 335.1136                     | 335.1136                    | 4.58          | 5.52          | 85.0296       | C <sub>4</sub> H <sub>5</sub> O <sub>2</sub>   | 11             | Detected | Detected | 2b           |
|                                                |                                                 |                              |                             |               |               | 121.0292      | C <sub>7</sub> H <sub>5</sub> O <sub>2</sub>   |                |          |          |              |
|                                                |                                                 |                              |                             |               |               | 153.0557      | C <sub>8</sub> H <sub>9</sub> O <sub>3</sub>   |                |          |          |              |
|                                                |                                                 |                              |                             |               |               | 199.0613      | C <sub>9</sub> H <sub>11</sub> O <sub>5</sub>  |                |          |          |              |
| 10-Hydroxy oleuropein aglycone                 | C <sub>19</sub> H <sub>22</sub> O <sub>9</sub>  | 393.1193                     | 393.1195                    | 4.63          | 5.48          | 137.0244      | C <sub>7</sub> H <sub>5</sub> O <sub>3</sub>   | 12             | Detected | Detected | 2b           |
|                                                |                                                 |                              |                             |               |               | 181.0502      | C <sub>9</sub> H <sub>9</sub> O <sub>4</sub>   |                |          |          |              |
| Ligstroside                                    | C <sub>25</sub> H <sub>32</sub> O <sub>12</sub> | 523.1821                     | 523.1820                    | 6.74          | 6.80          | 69.0340       | C <sub>4</sub> H <sub>5</sub> O                | 11             | Detected | Detected | 2a           |
|                                                |                                                 |                              |                             |               |               | 89.0242       | C <sub>3</sub> H <sub>5</sub> O <sub>3</sub>   |                |          |          |              |
|                                                |                                                 |                              |                             |               |               | 101.0240      | C <sub>4</sub> H <sub>5</sub> O <sub>3</sub>   |                |          |          |              |
|                                                |                                                 |                              |                             |               |               | 127.0400      | C <sub>6</sub> H <sub>7</sub> O <sub>3</sub>   |                |          |          |              |
|                                                |                                                 |                              |                             |               |               | 139.0032      | C <sub>6</sub> H <sub>3</sub> O <sub>4</sub>   |                |          |          |              |
|                                                |                                                 |                              |                             |               |               | 165.0571      | C <sub>9</sub> H <sub>9</sub> O <sub>3</sub>   |                |          |          |              |
|                                                |                                                 |                              |                             |               |               | 171.0293      | C <sub>7</sub> H <sub>7</sub> O <sub>5</sub>   |                |          |          |              |

| Compound             | Molecular Formula                               | [M-H] <sup>-</sup> m/z calc. | [M-H] <sup>-</sup> m/z exp. | tr exp. (min) | tr QSRR (min) | Fragments m/z | Elemental Formula                               | Peak score A/I | Leaf     | Drupe    | Level Ident. |
|----------------------|-------------------------------------------------|------------------------------|-----------------------------|---------------|---------------|---------------|-------------------------------------------------|----------------|----------|----------|--------------|
|                      |                                                 |                              |                             |               |               | 223.0629      | C <sub>11</sub> H <sub>11</sub> O <sub>5</sub>  |                |          |          |              |
|                      |                                                 |                              |                             |               |               | 259.0966      | C <sub>15</sub> H <sub>15</sub> O <sub>4</sub>  |                |          |          |              |
|                      |                                                 |                              |                             |               |               | 291.0881      | C <sub>15</sub> H <sub>15</sub> O <sub>6</sub>  |                |          |          |              |
|                      |                                                 |                              |                             |               |               | 361.1305      | C <sub>19</sub> H <sub>21</sub> O <sub>7</sub>  |                |          |          |              |
| Ligstroside aglycone | C <sub>19</sub> H <sub>22</sub> O <sub>7</sub>  | 361.1291                     | 361.1293                    | 6.79          | 6.83          | 69.0346       | C <sub>4</sub> H <sub>5</sub> O                 | 21             | Detected | Detected | 2a           |
|                      |                                                 |                              |                             |               |               | 111.0077      | C <sub>5</sub> H <sub>2</sub> O <sub>3</sub>    |                |          |          |              |
|                      |                                                 |                              |                             |               |               | 137.0608      | C <sub>8</sub> H <sub>9</sub> O <sub>2</sub>    |                |          |          |              |
|                      |                                                 |                              |                             |               |               | 195.0663      | C <sub>10</sub> H <sub>11</sub> O <sub>4</sub>  |                |          |          |              |
|                      |                                                 |                              |                             |               |               | 259.0975      | C <sub>15</sub> H <sub>15</sub> O <sub>4</sub>  |                |          |          |              |
|                      |                                                 |                              |                             |               |               | 291.0875      | C <sub>15</sub> H <sub>15</sub> O <sub>6</sub>  |                |          |          |              |
| Nuzhenide            | C <sub>31</sub> H <sub>42</sub> O <sub>17</sub> | 685.2349                     | 685.2346                    | 6.20          | 6.19          | 89.0241       | C <sub>3</sub> H <sub>5</sub> O <sub>3</sub>    | 12             | -        | Detected | 2a           |
|                      |                                                 |                              |                             |               |               | 135.0453      | C <sub>8</sub> H <sub>7</sub> O <sub>2</sub>    |                |          |          |              |
|                      |                                                 |                              |                             |               |               | 223.0612      | C <sub>11</sub> H <sub>11</sub> O <sub>5</sub>  |                |          |          |              |
|                      |                                                 |                              |                             |               |               | 291.0871      | C <sub>15</sub> H <sub>15</sub> O <sub>6</sub>  |                |          |          |              |
|                      |                                                 |                              |                             |               |               | 369.0825      | C <sub>16</sub> H <sub>17</sub> O <sub>10</sub> |                |          |          |              |
|                      |                                                 |                              |                             |               |               | 453.1401      | C <sub>21</sub> H <sub>25</sub> O <sub>11</sub> |                |          |          |              |
|                      |                                                 |                              |                             |               |               | 563.1616      | C <sub>23</sub> H <sub>31</sub> O <sub>16</sub> |                |          |          |              |
| Oleoside             | C <sub>16</sub> H <sub>22</sub> O <sub>11</sub> | 389.1089                     | 389.1090                    | 6.79          | *             | 139.0032      | C <sub>6</sub> H <sub>3</sub> O <sub>4</sub>    | 4              | Detected | Detected | 2a           |
|                      |                                                 |                              |                             |               |               | 165.0552      | C <sub>9</sub> H <sub>9</sub> O <sub>3</sub>    |                |          |          |              |
|                      |                                                 |                              |                             |               |               | 183.0664      | C <sub>9</sub> H <sub>11</sub> O <sub>4</sub>   |                |          |          |              |
| Oleuropein aglycone  | C <sub>19</sub> H <sub>22</sub> O <sub>8</sub>  | 377.1241                     | 377.1243                    | 7.39          | 6.88          | 95.0496       | C <sub>6</sub> H <sub>7</sub> O                 | 19             | Detected | Detected | 2a           |
|                      |                                                 |                              |                             |               |               | 111.0087      | C <sub>5</sub> H <sub>3</sub> O <sub>3</sub>    |                |          |          |              |
|                      |                                                 |                              |                             |               |               | 139.0389      | C <sub>7</sub> H <sub>7</sub> O <sub>3</sub>    |                |          |          |              |
|                      |                                                 |                              |                             |               |               | 171.0286      | C <sub>7</sub> H <sub>7</sub> O <sub>5</sub>    |                |          |          |              |
|                      |                                                 |                              |                             |               |               | 191.0346      | C <sub>10</sub> H <sub>7</sub> O <sub>4</sub>   |                |          |          |              |
|                      |                                                 |                              |                             |               |               | 275.0556      | C <sub>14</sub> H <sub>11</sub> O <sub>6</sub>  |                |          |          |              |



| Compound                 | Molecular Formula                               | [M-H] <sup>-</sup> m/z calc. | [M-H] <sup>-</sup> m/z exp. | tr exp. (min) | tr QSRR (min) | Fragments m/z | Elemental Formula                              | Peak score A/I | Leaf     | Drupe    | Level Ident. |
|--------------------------|-------------------------------------------------|------------------------------|-----------------------------|---------------|---------------|---------------|------------------------------------------------|----------------|----------|----------|--------------|
| Secologanoside           | C <sub>16</sub> H <sub>22</sub> O <sub>11</sub> | 389.1089                     | 389.1088                    | 1.28          | 2.79          | 95.0499       | C <sub>6</sub> H <sub>7</sub> O                | 4              | Detected | Detected | 2a           |
|                          |                                                 |                              |                             |               |               | 101.0244      | C <sub>4</sub> H <sub>5</sub> O <sub>3</sub>   |                |          |          |              |
|                          |                                                 |                              |                             |               |               | 139.0752      | C <sub>8</sub> H <sub>11</sub> O <sub>2</sub>  |                |          |          |              |
|                          |                                                 |                              |                             |               |               | 165.0550      | C <sub>9</sub> H <sub>9</sub> O <sub>3</sub>   |                |          |          |              |
|                          |                                                 |                              |                             |               |               | 183.0645      | C <sub>9</sub> H <sub>9</sub> O <sub>4</sub>   |                |          |          |              |
|                          |                                                 |                              |                             |               |               | 345.1100      | C <sub>15</sub> H <sub>21</sub> O <sub>9</sub> |                |          |          |              |
| <b>Triterpenic acids</b> |                                                 |                              |                             |               |               |               |                                                |                |          |          |              |
| Maslinic acid            | C <sub>30</sub> H <sub>48</sub> O <sub>4</sub>  | 471.3484                     | 471.3481                    | 12.86         | 12.58         | 393.3163      | C <sub>28</sub> H <sub>41</sub> O              | 15             | Detected | Detected | 2a           |
|                          |                                                 |                              |                             |               |               | 405.3158      | C <sub>29</sub> H <sub>41</sub> O              |                |          |          |              |
|                          |                                                 |                              |                             |               |               | 423.3256      | C <sub>29</sub> H <sub>43</sub> O <sub>2</sub> |                |          |          |              |
|                          |                                                 |                              |                             |               |               | 437.3061      | C <sub>29</sub> H <sub>41</sub> O <sub>3</sub> |                |          |          |              |
| Oleanolic acid           | C <sub>30</sub> H <sub>48</sub> O <sub>3</sub>  | 455.3535                     | 455.3536                    | 13.91         | 12.69**       | 120.0940      | C <sub>9</sub> H <sub>12</sub>                 | 16             | Detected | Detected | 2a           |
|                          |                                                 |                              |                             |               |               | 152.1202      | C <sub>10</sub> H <sub>16</sub> O              |                |          |          |              |
|                          |                                                 |                              |                             |               |               | 407.3313      | C <sub>29</sub> H <sub>43</sub> O              |                |          |          |              |
|                          |                                                 |                              |                             |               |               | 441.3430      | C <sub>29</sub> H <sub>45</sub> O <sub>3</sub> |                |          |          |              |
| <b>Coumarins</b>         |                                                 |                              |                             |               |               |               |                                                |                |          |          |              |
| Aesculin                 | C <sub>15</sub> H <sub>15</sub> O <sub>9</sub>  | 338.0643                     | 338.0645                    | 5.41          | 4.01          | 112.0164      | C <sub>5</sub> H <sub>4</sub> O <sub>3</sub>   | 16             | Detected | -        | 2a           |
|                          |                                                 |                              |                             |               |               | 153.0189      | C <sub>7</sub> H <sub>5</sub> O <sub>4</sub>   |                |          |          |              |
|                          |                                                 |                              |                             |               |               | 161.0248      | C <sub>9</sub> H <sub>5</sub> O <sub>3</sub>   |                |          |          |              |
|                          |                                                 |                              |                             |               |               | 171.0287      | C <sub>7</sub> H <sub>7</sub> O <sub>5</sub>   |                |          |          |              |
|                          |                                                 |                              |                             |               |               | 220.0581      | C <sub>8</sub> H <sub>12</sub> O <sub>7</sub>  |                |          |          |              |
|                          |                                                 |                              |                             |               |               | 268.0577      | C <sub>12</sub> H <sub>12</sub> O <sub>7</sub> |                |          |          |              |
|                          |                                                 |                              |                             |               |               | 311.0761      | C <sub>14</sub> H <sub>15</sub> O <sub>8</sub> |                |          |          |              |
| <b>Other compounds</b>   |                                                 |                              |                             |               |               |               |                                                |                |          |          |              |

| Compound                                               | Molecular Formula                               | [M-H] <sup>-</sup> m/z calc. | [M-H] <sup>-</sup> m/z exp. | t <sub>R</sub> exp. (min) | t <sub>R</sub> QSRR (min) | Fragments m/z | Elemental Formula                               | Peak score A/I | Leaf     | Drupe    | Level Ident. |
|--------------------------------------------------------|-------------------------------------------------|------------------------------|-----------------------------|---------------------------|---------------------------|---------------|-------------------------------------------------|----------------|----------|----------|--------------|
| Elenolic acid                                          | C <sub>11</sub> H <sub>14</sub> O <sub>6</sub>  | 241.0714                     | 241.0716                    | 4.09                      | 4.26                      | 95.0494       | C <sub>6</sub> H <sub>7</sub> O                 | 24             | Detected | Detected | 2a           |
|                                                        |                                                 |                              |                             |                           |                           | 121.0289      | C <sub>7</sub> H <sub>5</sub> O <sub>2</sub>    |                |          |          |              |
|                                                        |                                                 |                              |                             |                           |                           | 127.0396      | C <sub>6</sub> H <sub>7</sub> O <sub>3</sub>    |                |          |          |              |
|                                                        |                                                 |                              |                             |                           |                           | 139.0029      | C <sub>6</sub> H <sub>3</sub> O <sub>4</sub>    |                |          |          |              |
|                                                        |                                                 |                              |                             |                           |                           | 139.0410      | C <sub>7</sub> H <sub>7</sub> O <sub>3</sub>    |                |          |          |              |
|                                                        |                                                 |                              |                             |                           |                           | 149.0236      | C <sub>8</sub> H <sub>5</sub> O <sub>3</sub>    |                |          |          |              |
| 165.0572                                               | C <sub>9</sub> H <sub>9</sub> O <sub>3</sub>    |                              |                             |                           |                           |               |                                                 |                |          |          |              |
| Elenolic acid 2-O-glucoside (Oleoside 11-methyl ester) | C <sub>17</sub> H <sub>24</sub> O <sub>11</sub> | 403.1245                     | 403.1242                    | 2.96                      | 2.12                      | 113.0248      | C <sub>5</sub> H <sub>5</sub> O <sub>3</sub>    | 11             | Detected | Detected | 2a           |
|                                                        |                                                 |                              |                             |                           |                           | 119.0352      | C <sub>4</sub> H <sub>8</sub> O <sub>4</sub>    |                |          |          |              |
|                                                        |                                                 |                              |                             |                           |                           | 181.0512      | C <sub>9</sub> H <sub>9</sub> O <sub>4</sub>    |                |          |          |              |
|                                                        |                                                 |                              |                             |                           |                           | 310.1163      | C <sub>15</sub> H <sub>18</sub> O <sub>7</sub>  |                |          |          |              |
|                                                        |                                                 |                              |                             |                           |                           | 371.0900      | C <sub>16</sub> H <sub>19</sub> O <sub>10</sub> |                |          |          |              |
| Hydroxylated form of elenolic acid                     | C <sub>11</sub> H <sub>14</sub> O <sub>7</sub>  | 257.0667                     | 257.0671                    | 2.92                      | *                         | 137.0603      | C <sub>8</sub> H <sub>9</sub> O <sub>2</sub>    | 4              | Detected | -        | 3            |
|                                                        |                                                 |                              |                             |                           |                           | 181.0535      | C <sub>9</sub> H <sub>9</sub> O <sub>4</sub>    |                |          |          |              |
| Licodione                                              | C <sub>15</sub> H <sub>12</sub> O <sub>5</sub>  | 271.0611                     | 271.0616                    | 7.19                      | 7.63                      | 83.0154       | C <sub>4</sub> H <sub>3</sub> O <sub>2</sub>    | 5              | Detected | -        | 2a           |
|                                                        |                                                 |                              |                             |                           |                           | 119.0506      | C <sub>8</sub> H <sub>7</sub> O                 |                |          |          |              |
|                                                        |                                                 |                              |                             |                           |                           | 151.0037      | C <sub>7</sub> H <sub>3</sub> O <sub>4</sub>    |                |          |          |              |
|                                                        |                                                 |                              |                             |                           |                           | 177.0160      | C <sub>9</sub> H <sub>5</sub> O <sub>4</sub>    |                |          |          |              |
|                                                        |                                                 |                              |                             |                           |                           | 187.0364      | C <sub>11</sub> H <sub>7</sub> O <sub>3</sub>   |                |          |          |              |

| Compound     | Molecular Formula                               | [M-H] <sup>-</sup> m/z calc. | [M-H] <sup>-</sup> m/z exp. | t <sub>R</sub> exp. (min) | t <sub>R</sub> QSRR (min) | Fragments m/z | Elemental Formula                               | Peak score A/I | Leaf | Drupe    | Level Ident. |
|--------------|-------------------------------------------------|------------------------------|-----------------------------|---------------------------|---------------------------|---------------|-------------------------------------------------|----------------|------|----------|--------------|
| Suspensaside | C <sub>29</sub> H <sub>36</sub> O <sub>16</sub> | 639.1930                     | 639.1934                    | 4.46                      | 6.01                      | 113.0244      | C <sub>5</sub> H <sub>5</sub> O <sub>3</sub>    | 7              | -    | Detected | 2a           |
|              |                                                 |                              |                             |                           |                           | 127.0399      | C <sub>6</sub> H <sub>7</sub> O <sub>3</sub>    |                |      |          |              |
|              |                                                 |                              |                             |                           |                           | 135.0442      | C <sub>8</sub> H <sub>7</sub> O <sub>2</sub>    |                |      |          |              |
|              |                                                 |                              |                             |                           |                           | 161.0233      | C <sub>9</sub> H <sub>5</sub> O <sub>3</sub>    |                |      |          |              |
|              |                                                 |                              |                             |                           |                           | 179.0335      | C <sub>9</sub> H <sub>7</sub> O <sub>4</sub>    |                |      |          |              |
|              |                                                 |                              |                             |                           |                           | 241.0694      | C <sub>11</sub> H <sub>13</sub> O <sub>6</sub>  |                |      |          |              |
|              |                                                 |                              |                             |                           |                           | 265.0743      | C <sub>13</sub> H <sub>13</sub> O <sub>6</sub>  |                |      |          |              |
|              |                                                 |                              |                             |                           |                           | 325.0944      | C <sub>15</sub> H <sub>17</sub> O <sub>8</sub>  |                |      |          |              |
|              |                                                 |                              |                             |                           |                           | 459.1525      | C <sub>20</sub> H <sub>27</sub> O <sub>12</sub> |                |      |          |              |
|              |                                                 |                              |                             |                           |                           | 479.1560      | C <sub>23</sub> H <sub>27</sub> O <sub>11</sub> |                |      |          |              |
|              |                                                 |                              |                             |                           |                           | 621.1832      | C <sub>29</sub> H <sub>33</sub> O <sub>15</sub> |                |      |          |              |

Peak Score (A/I): ratio of peak area to intensity

Level Ident.: Level of identification (Level 1 corresponds to confirmed structures with a reference standard; level 2a: evidence by spectra matching from literature or library and level 2b: diagnostic evidence where no other structure fits the experimental MS/MS information; level 3 for tentative candidate).

t<sub>R</sub> QSRR: Predicted retention time with the in-house QSRR model [1,2]

\*t<sub>R</sub>: The retention time prediction results are not reliable and other verification methods such as MS/MS fragmentation pattern should be applied.

\*\*t<sub>R</sub>: The retention time prediction result is not reliable because the compound is found to be outside of applicability domain of the model [3,4].

**Table S6.** Percentages of increase or decrease of the analytical signals during the experimental time periods 3 to 6 min and 6 to 10 min

| Compounds                                              | % increase<br>in analytical signal<br>(3-6 min infusion) | % increase<br>in analytical signal<br>(6-10 min infusion) |
|--------------------------------------------------------|----------------------------------------------------------|-----------------------------------------------------------|
| <b>Target compounds</b>                                |                                                          |                                                           |
| Gallic acid                                            | 99                                                       | 98                                                        |
| Tyrosol                                                | 129                                                      | 231                                                       |
| Vanillin                                               | 119                                                      | 113                                                       |
| Luteolin                                               | 85                                                       | 72                                                        |
| <b>Suspect compounds</b>                               |                                                          |                                                           |
| 4-Hydroxybenzoic acid                                  | 99                                                       | 101                                                       |
| 4-Hydroxyphenylacetic acid                             | 128                                                      | 119                                                       |
| Vanillic acid                                          | 104                                                      | 107                                                       |
| Verbascoside                                           | 129                                                      | 125                                                       |
| Calceolarioside                                        | 76                                                       | 80                                                        |
| Hydroxytyrosol glucoside                               | 125                                                      | 118                                                       |
| Tyrosol glucoside (Salidroside)                        | 118                                                      | 117                                                       |
| Apigenin-7-O-glucoside                                 | 125                                                      | 379                                                       |
| Diosmin                                                | 64                                                       | 71                                                        |
| Luteolin-7-O-glucoside                                 | 94                                                       | 103                                                       |
| Luteolin-7,4'-O-diglucoside                            | 128                                                      | 136                                                       |
| Quercetin-3-O-rutinoside (Rutin)                       | 120                                                      | 124                                                       |
| Vicenin-2                                              | 120                                                      | 112                                                       |
| Demethyl oleuropein                                    | 229                                                      | 127                                                       |
| Fraxamoside                                            | 110                                                      | 104                                                       |
| 10-Hydroxy-10-Methyl oleuropein aglycone               | 105                                                      | 103                                                       |
| 10-Hydroxy decarboxymethyl oleuropein aglycone         | 91                                                       | 249                                                       |
| Ligstroside                                            | 128                                                      | 115                                                       |
| Ligstroside aglycone                                   | 127                                                      | 111                                                       |
| Oleoside                                               | 114                                                      | 115                                                       |
| Oleuropein aglycone                                    | 122                                                      | 123                                                       |
| Secologanoside                                         | 114                                                      | 122                                                       |
| Elenolic acid 2-O-glucoside (Oleoside 11-methyl ester) | 122                                                      | 117                                                       |

## References

1. Aalizadeh, R.; Thomaidis, N.S.; Bletsou, A.A.; Gago-Ferrero, P. Quantitative Structure-Retention Relationship Models to Support Nontarget High-Resolution Mass Spectrometric Screening of Emerging Contaminants in Environmental Samples. *J. Chem. Inf. Model.* **2016**, *56*, 1384–1398, doi:10.1021/acs.jcim.5b00752.
2. Gago-Ferrero, P.; Schymanski, E.L.; Bletsou, A.A.; Aalizadeh, R.; Hollender, J.; Thomaidis, N.S. Extended Suspect and Non-Target Strategies to Characterize Emerging Polar Organic Contaminants in Raw Wastewater with LC-HRMS/MS. *Environ. Sci. Technol.* **2015**, *49*, 12333–12341, doi:10.1021/acs.est.5b03454.
3. Kalogiouri, N.P.; Alygizakis, N.A.; Aalizadeh, R.; Thomaidis, N.S. Olive oil authenticity studies by target and nontarget LC-QTOF-MS combined with advanced chemometric techniques. *Anal. Bioanal. Chem.* **2016**, *408*, 7955–7970, doi:10.1007/s00216-016-9891-3.
4. Kalogiouri, N.P.; Aalizadeh, R.; Thomaidis, N.S. Application of an advanced and wide scope non-target screening workflow with LC-ESI-QTOF-MS and chemometrics for the classification of the Greek olive oil varieties. *Food Chem.* **2018**, *256*, 53–61, doi:10.1016/j.foodchem.2018.02.101.
